# Supplementary material
Source: bioRxiv or medRxiv preprint supplement (https://www.biorxiv.org/highwire/filestream/62242/field_highwire_adjunct_files/9/130948-8.pdf)
Supplement: Supplementary file [file 130948-8.pdf]

| Study  | Panels | Subjects | Total Samples | CyTOF samples | FCM samples | Name                                                                                                       | Institute                     |
|--------|--------|----------|---------------|---------------|-------------|------------------------------------------------------------------------------------------------------------|-------------------------------|
| SDY112 | 3      | 91       | 188           | 95            | 93          | T cell responses to H1N1v and a longitudinal study of seasonal influenza vaccination (TIV) - 2011          | Stanford                      |
| SDY167 | 1      | 44       | 131           | 0             | 131         | A Phase I Study of the Safety and Immunogenicity of a Recombinant DNA Plasmid Vaccine in Healthy Adults    | Vaccine Research Center NIAID |
| SDY180 | 30     | 36       | 510           | 0             | 510         | Quantitative and qualitative differences in response to Fluzone influenza vaccine and pneumococcal vaccine | Baylor Research Institute     |
| SDY311 | 6      | 75       | 134           | 79            | 55          | T cell responses to H1N1v and a longitudinal study of seasonal influenza vaccination (TIV) - 2010          | Stanford                      |
| SDY312 | 11     | 82       | 616           | 0             | 616         | T cell responses to H1N1v and a longitudinal study of seasonal influenza vaccination (TIV) - 2009          | Stanford                      |
| SDY314 | 5      | 87       | 445           | 0             | 445         | T cell responses to H1N1v and a longitudinal study of seasonal influenza vaccination (TIV) - 2008          | Stanford                      |
| SDY315 | 5      | 73       | 125           | 74            | 51          | T cell responses to H1N1v and a longitudinal study of seasonal influenza vaccination (TIV) - 2012          | Stanford                      |
| SDY420 | 11     | 278      | 511           | 284           | 227         | Immunobiology of Aging                                                                                     | Stanford                      |
| SDY478 | 1      | 70       | 73            | 73            | 0           | T cell responses to H1N1v and a longitudinal study of seasonal influenza vaccination - 2013                | Stanford                      |
| SDY736 | 13     | 148      | 193           | 0             | 193         | Human Aging and CMV                                                                                        | University of Arizona         |

Supplementary Table 3: A summary of 10 studies included in the meta-analysis.
